1 Determinants of growth and body size in *Austrolebias* South-American annual killifish

2

3 Andrew Helmstetter<sup>1,2</sup>

4 Tom JM Van Dooren<sup>3</sup>

5 <sup>1</sup>Department of Life Sciences, Silwood Park Campus, Imperial College London, Ascot, SL5 5 7PY,

6 Berkshire, UK

7 <sup>2</sup>CNRS - UMR DIADE, University of Montpellier, Montpellier, France

8

9 <sup>3</sup>CNRS - UMR 7618 Institute of Ecology and Environmental Sciences (iEES) Paris, Sorbonne

10 University, Case 237, 4 place Jussieu, 75005 Paris, France

11

12 Version 31 December 2019

13

14 Words: 6151

15 Figures: 5

16 Tables: 1

17 The data will be deposited in the Dryad Digital Repository.

18

19 Abstract (190)

20 Patterns of size variation in fish are supposed to be generated by growth differences, not by egg or  
21 hatchling size variation. However, annual killifish live in temporary ponds with a limited time period  
22 available for growth and reproduction. It has therefore been hypothesized that among annual  
23 killifish, hatchling size variation should be of large relative importance to generate adaptive adult  
24 size variation. Using growth curves of 203 individuals from 18 *Austrolebias* species raised in a  
25 common environment, we demonstrate that hatchling size variation indeed is a main determinant of  
26 adult size variation in annual killifish, in agreement with the time constraint hypothesis.  
27 Furthermore, we find an increased early growth rate in piscivorous species augmenting their  
28 difference in size from small congeneric species. This should be adaptive if size differences  
29 determine predation success. Environmental effects of spatial location of the population of origin on  
30 hatchling size and growth suggest that the time constraint might be weakened in populations  
31 occurring near the Atlantic coast. Our study reveals how extreme environments demand specific life  
32 history solutions to achieve adaptive size variation and that there might be scope for local  
33 adaptations in growth trajectories.

34

35 Introduction

36

37 Body size differences are seen as key to understanding life history variation (Roff 1993). Teleost fish  
38 alone are spanning nearly nine orders of magnitude in mature size and this is supposed to be due to  
39 evolved differences in growth, not to size variation at hatching (Sibly et al 2015). At the same time,  
40 there is enormous variation in life cycles among teleost fish and in the ecological and evolutionary  
41 variability affecting size differences between closely related species and between and within  
42 populations (Hutchings 2002). For example, Atlantic salmon vary 14-fold in size at maturity between  
43 populations (Hutchings and Jones 1998) and this variability has been linked to temperature-  
44 dependent growth (Jonsson et al 2013).

45 Size variation and adaptation in fish is much studied in the context of size-selective harvesting (Law  
46 2007). The topic has spurred a modelling effort to support arguments that responses of populations  
47 to size-selective harvesting are adaptive (Ernande et al. 2004). Other modelling studies have aimed  
48 to predict how competition can affect the emergence of size differences within populations or  
49 between species. For example, Persson et al (2000) and Claessen et al (2000) have shown that  
50 significant size differences can emerge within fish populations as a consequence of competition for  
51 food and cannibalism, leading to so-called dwarfs and giants. Van Dooren et al. (2018) referred to  
52 these studies to propose that large piscivorous annual killifish and their prey evolved in sympatry  
53 due to a similar scenario of adaptation. Metabolic scaling studies such as Sibly et al (2015) then state  
54 that such size differences between fish species must be due to slower or faster juvenile growth,  
55 whereas all individuals within a species should grow as fast as environmental conditions for  
56 development and metabolism permit. This theory implies that size differences within and between  
57 populations can then only be explained by different environmental conditions which individuals  
58 experience, leaving little or no room for adaptive variation in the use of resources to achieve  
59 particular body sizes. On top of that, expected relative growth rates in fish are expected to decrease

60 with age (Pauly 1979) such that initial growth differences and initial environments have larger  
61 effects on adult size.

62

63 Within the toothcarps (Cyprinodontiformes), annual killifish have evolved at least five times from  
64 non-annual species (Furness et al 2015, Helmstetter et al 2016). Annualism denotes that these  
65 species inhabit ephemeral waters and that their life history strategy resembles that of annual plants:  
66 they establish egg banks where embryos survive dry periods by going through one or several  
67 diapauses during development (Wourms 1972). Large size differences among closely related annual  
68 killifish species have evolved repeatedly (Costa 2011). Within the genus *Austrolebias* which occurs in  
69 South-American temperate environments, large size evolved from small (Van Dooren et al 2018,  
70 Helmstetter et al. 2018) and adult body lengths range from about three centimeter to fifteen (Costa  
71 2006), corresponding to a more than hundredfold difference in volume. One of the clades with large  
72 species in *Austrolebias* have become specialized piscivores (Costa 2011, Van Dooren et al 2018). In  
73 the African genus *Nothobranchius* there is similar size variation involving the evolution of piscivory  
74 (Costa 2011, Costa 2018). This genus is well-known for its explosive growth and extremely early  
75 maturity, observed both in the lab and the field (Blažek et al 2013, Vrtilek et al 2018). Within killifish,  
76 adult body sizes are not only determined by growth variability as Sibly et al (2015) predicted.  
77 Eckerström-Liedholm et al. (2017) found that egg sizes in annual fish are larger than in non-annual  
78 toothcarp species and explained this as an adaptation to environments with time constraints on  
79 growth periods such as the temporary ponds annual fish inhabit. By being born from larger eggs,  
80 annual killifish achieve large (adaptive) sizes by increasing hatchling size instead of growing longer.  
81 We investigated in a common garden lab context and using the South-American annual killifish  
82 genus *Austrolebias* how both small and large species in this genus achieve the size differences  
83 known from the field and the lab (Figure one). We aimed to identify the major axis among different  
84 components contributing to size variation (Schluter 1996): either growth variation (Sibly et al 2015)

85 or hatchling size variation (Eckerström-Liedholm et al 2017) might explain body size differences  
86 more. Hatchlings were obtained from a range of eighteen species mostly occurring in regions close  
87 to the Atlantic Ocean and these were raised individually in separate tanks to provide individual  
88 growth data. Sizes were measured repeatedly over an eight weeks period. We investigated effects of  
89 different environmental variables on hatchling size and growth and compared the patterns of  
90 growth rates between the geographic locations of the sites of origin of the populations in our study.  
91 We find that hatchling size variation makes the largest contribution to size variation between  
92 species, but the relative importance of early post-hatching growth on individual size variation is  
93 comparable with hatchling size. Our results thus confirm that large body sizes in some species are to  
94 a large extent determined by large hatchling size and we reject the hypothesis that only growth  
95 variation matters for size differences between fish species.

96

97 Material and methods

98

99 We triggered hatching of embryos of 18 *Austrolebias* species (Fig. 1) stored in brown peat, by  
100 flooding the peat and eggs with water (15 C, 20% aged tap water, 80% RO water, peat extract). Six of  
101 the species are usually classified as large and they belong to three different clades (Van Dooren et al  
102 2018, Helmstetter et al 2018). Three species in this experiment are from a single clade of large  
103 species containing specialized piscivores (Costa 2010). The 18 species originate from three different  
104 Atlantic coastal areas of endemism (Costa 2009), with the populations in this experiment originating  
105 from a single such area per species (La Plata river basin, Negro river basin, Patos coastal lagoons,  
106 Helmstetter et al. 2018). In these regions, temporary ponds dry in summer. The inland seasonal  
107 pattern of rainfall in the Chaco region is different. At the moment of hatching, embryos were  
108 between four and forty-two months old.

109

110 Hatchlings that were swimming freely (with inflated swim bladder) were placed in separate 0.25 L  
111 plastic raising tanks and gradually moved into increasingly larger tanks as they grew. Water  
112 parameters were controlled to the following values: <12 dGH, <10 mg/L NO<sub>3</sub>, < 0.1 mg/L NO<sub>2</sub>, < 0.25  
113 mg/L NH<sub>3</sub>, pH = 7.0 - 8.0, 22 ± 0.5 C, by diluting water in the raising tanks daily with water from  
114 reserves stored in the same room. The fish experienced a 14L:10D photoperiod. Hatchlings were fed  
115 *Artemia salina* nauplii daily for two weeks and then a combination of *Artemia salina*, Chironomid  
116 larvae, Tubifex and *Daphnia pulex*. We ensured that the raising tanks always contained live food,  
117 such that the fish could feed to satiation. Each tank contained plants (*Vesicularia dubyana* and  
118 *Egeria densa*) as well as 5 g of boiled brown peat to aggregate waste and maintain water  
119 parameters. At day 58, 32 fish showed visible evidence of stunting or hampered growth (bent spine -  
120 extreme lack of growth) and they were assigned to a separate "stunted" category for analysis.

121

## 122 Photography

123 We photographed individual fish using a digital USB microscope at hatching (day 1) and repeatedly  
124 after that, after intervals of increasing duration with age. We obtained up to nine measurements per  
125 individual fish. We constrained the fish in small chambers and photographed from a lateral and  
126 dorsal perspective or placed larger fish in a shallow water layer in a petri dish to make lateral  
127 pictures only. We measured total length, the distance from anterior tip of the maxilla to the  
128 posterior tip of the caudal fin, using ImageJ.

129

## 130 Statistical analysis

131 Van Dooren et al (2018) and Helmstetter et al (2018) investigated whether shifts in selection regimes  
132 occurred for size and niche traits within *Austrolebias*. Helmstetter et al (2018) identified a shift to a

133 selection regime with an increased optimum size for the clade containing *A. elongatus*. An analysis  
134 for shifts on the posterior distributions of phylogenies in Van Dooren et al (2018) found similar shifts  
135 for the other clades containing large species in a fraction of trees. Niche traits showed weak  
136 evidence for a niche shift in the Negro area (Helmstetter et al 2018). These results make it necessary  
137 to use membership of the clades with large species and the areas of endemism as explanatory  
138 variables to accommodate effects of the detected regime shifts and to accommodate other similar  
139 potential shifts for the traits we investigate. The remaining species differences are then random with  
140 respect to these estimated shifts and the species effects can be treated as random effects.

141

142 **Survival and stunting.** Next to species differences in mortality, the incidence of stunted body  
143 morphologies can indicate whether the environmental conditions we imposed permit normal  
144 growth. We therefore assessed survival variation between species and whether the risk of becoming  
145 stunted differed between species or depended on age of the embryos at inundation. The proportion  
146 of individuals alive at day 50 (before some *A. wolterstorffii* were moved out of the experiment into  
147 bigger tanks) was analysed using a binomial generalized additive (GAM, Wood 2017) or generalized  
148 linear model (GLM cCullagh and Nelder 1989). Age at hatching, membership of a clade of large  
149 species (yielding three categories of large species and one small), area of endemism per species  
150 (three areas) and spatial coordinates of the location where the individuals were sampled that the  
151 hatchling descended from were used as explanatory variables.

152 We used scores of the two components of a principal component PC analysis carried out on latitude  
153 and longitude of all ponds. The ponds are not randomly distributed across the South-American  
154 continent and we wanted to use two independent explanatory variables characterizing spatial  
155 locations. The scores were standardized across all observations, so that their averages would be zero  
156 across each dataset analysed. We first added scores as thin plate regression splines, hence GAM  
157 were fitted (Wood 2017). When model comparisons revealed that these effects should not be

158 retained in the model or when they could all be fitted as linear effects, GLM's were fitted. Model  
159 selection occurred by model simplification using likelihood ratio tests (LRT smooth terms and  
160 interaction terms first if present) for comparisons. The probability to become stunted in the  
161 experiment was analyzed similarly. We did not include sex effects (male/female/unknown) as an  
162 explanatory variable here, as an individual might end up in the “unknown” category due to stunting  
163 or premature death.

164

165 **Initial size.** We investigated variables affecting initial size at hatching using phylogenetic linear mixed  
166 models (de Villemereuil and Nakagawa 2014) and linear mixed models (Pinheiro and Bates 2000). In  
167 this manner, unbalanced data can be analyzed while different sources of variation in the data are  
168 addressed simultaneously. In each model, we fitted different explanatory (fixed) variables, i.e.,  
169 embryo age, being classified as stunted, sex, areas of endemism, clades with large species and, as  
170 above, we fitted models with the coordinate scores of capture locations. Different random effects  
171 were included. In the maximal models, a random species effect with species covariances calculated  
172 according the expected values under a Brownian motion model of evolution and next to that a  
173 species effect with zero covariances. The expected covariances of the phylogenetic random effects  
174 were calculated on the basis of a consensus nDNA tree from Helmstetter et al. (2018). We tested  
175 whether including the phylogenetically structured random species effects contributed significantly  
176 using a likelihood ratio test. We carried out model selection on the fixed effects as above using  
177 likelihood ratio tests (Bolker et al 2009). We used function `lmeKin()` to fit the mixed models including  
178 phylogenetic random effects in R (Therneau 2012). For models which did not account for  
179 phylogenetic relatedness, we used linear mixed models or generalized additive mixed models  
180 (GAMM) with smooth functions to fit the scores of spatial coordinates.

181



182 **Growth.** We inspected growth curves  $y(t)$  of age  $t$  (days since hatching) using smooth functions  
183 (Wood 2017), where we used thin plate regression splines of  $t$  per species and a smoothness  
184 parameter shared between species (factor smooth interaction, function `gam` from library `mgcv()`,  
185 option "bs=fs", Wood 2017). We found recent field data on individual size at age for three  
186 *Austrolebias* species (Garcia et al 2018) and added these to a figure to check that our common  
187 garden environment allowed individuals to grow to sizes comparable to field conditions. From two  
188 lab studies, average sizes at different ages were extracted. Errea and Danulat (2001) provided an  
189 average total length at age for *Austrolebias viarius* kept in the lab at 25C and Fonseca et al (2013)  
190 provide average standard lengths for *Austrolebias wolterstorffi* kept at 24C.

191 Per individual, we calculated estimates of relative growth per day  $g_i$  from the data as

192

$$193 \quad g_i = \left( \frac{y_{i+1}}{y_i} \right)^{\frac{1}{t_{i+1} - t_i}} \quad (\text{Eqn. 1})$$

194

195 where  $y_i$  and  $y_{i+1}$  are successive size measurements on the same individual at ages  $t_i$  and  $t_{i+1}$ . The  
196 standard calculation of relative growth rate is the logarithm of this quantity (Hoffmann and Poorter  
197 2002). We decided to integrate the instantaneous rate over a time interval of one day such that  $g_i$   
198 becomes the relative increase per day which is easier to interpret.  $100*(g_i - 1)$  is the percentage  
199 relative increase per day. We inspect and analyze relative increases per day at interval midpoints  
200  $x_i = (t_i + t_{i+1})/2$ . For illustration, we fitted smooth functions to the relative growth  $g_i$  evaluated  
201 at interval midpoints  $x_i$ .

202

203 We investigated which variables affect relative growth as above, using generalized additive and  
204 phylogenetic or non-phylogenetic mixed models. As each analysis contains several measures of  
205 relative growth per individual, we added individual random effects nested within the non-  
206 phylogenetic species effect. We derived an expression for the error of the relative growth

207 calculations (Supplement), which we implemented in the mixed models. However, it was  
208 systematically outperformed by a variance regression for the residual variance which changed with  
209 the number of days after hatching (using `varExp()` weights in `lme()`, see Pinheiro and Bates 2000).

210

211 **Relative contributions of initial size and relative growth to final size variation.** Final size at the end  
212 of the experiment (day 58 after hatching) depends on initial size at hatching and on the cumulative  
213 growth over the time interval. We can partition cumulative growth into the contributions of  
214 different periods to assess their relative importance in the generation of size variation. Log-  
215 transformed final size in the experiment consists of additive effects of initial size and growth as  
216 shown below. This allows a useful variance decomposition (Rees et al 2010) of final size in the  
217 experiment in terms of initial size and growth in different time intervals.

218 Because day 57 was the last day where the majority of fish were measured, we decomposed final  
219 size of an individual  $y_{57}$  at day 57 of the experiment as follows:

$$220 \quad y_{57} = y_1 \overbrace{g_1 g_2 \dots g_n}^{G_n} \overbrace{g_{n+1} g_{n+2} \dots g_{56}}^{G_{56}} \quad (\text{Eqn. 2})$$

221

222 We chose to partition the relative growth per day  $g_i$  into two periods, from day one to  $n$  and from day  
223  $n + 1$  to day 56. For the analysis presented, we chose  $n = 28$  because this provided two intervals of  
224 similar length, with a large number of individuals measured at the end of the first interval. When we  
225 log-transform (Eqn. 2), we obtain a sum of contributions to log final size:  $\ln y_{57} = \ln y_1 + \ln G_{28} +$   
226  $\ln G_{56}$ . By means of a variance decomposition of  $\ln y_{57}$  in the variances and covariances of these three  
227 terms, we can assess the contribution of each term to final size variation in the experiment (Rees et  
228 al. 2010).

229 For individuals that were not measured on days 29 and 57 but just before or after (14/111 and 14/94,  
230 respectively), we extrapolated their sizes to these days (one or two days away), using the relative

231 growth over the last interval in the period. Magnitudes of the three contributions to final size in the  
232 experiment were compared with paired samples Wilcoxon tests (Wilcoxon 1945).

233 The log size variance on day 57 of the experiment depends on the variances of the three components  
234 contributing and their covariances (Eqn. 3).

235

$$236 \sigma^2_{\ln y_{57}} = \sigma^2_{\ln y_1} + \sigma^2_{\ln G_{28}} + \sigma^2_{\ln G_{56}} + 2\sigma_{\ln y_1, \ln G_{28}} + 2\sigma_{\ln y_1, \ln G_{56}} + 2\sigma_{\ln G_{28}, \ln G_{56}}$$

237 (Eqn. 3)

238

239 This is the covariance of final size with itself, which is the sum of the covariance of final size with initial  
240 size, the covariance of final size with log relative growth until day 29 (early growth), and with log  
241 relative growth between days 28 and 57 (late growth). We can interpret absolute values of these three  
242 quantities divided by their sum as relative importances (Rees et al. 2010).

243 We determined relative importances of the three components for the variance between individuals,  
244 restricted to individuals that were not stunted and which provided values for all three terms. We  
245 resampled the dataset 100 times to obtain standard deviations on the relative importances.

246 We also calculated relative importances for the variance in final size between species. To obtain  
247 estimates of component variances and covariances, we fitted multivariate mixed models (Bates et al  
248 2014) to the three log components of final size with random species effects, allowing random effect  
249 covariances between the three component traits and including the fixed effects listed above with  
250 component-specific values. In agreement with the analyses of initial size and relative growth rates, we  
251 present results assuming random effects per trait which are independent between species. The  
252 covariances between the final sizes per species and each size component were then calculated as  
253 follows. Predicted values of the summed fixed and random effect part of the mixed model were  
254 generated for all species (twelve) where predictions for all three components could be made, To  
255 remove individual variation in the fixed effects, we assumed for the predicted values that fish were  
256 hatched after four months in the egg, did not show stunted growth and were sexed as a male. The

257 species-specific areas of endemism and taxa with large species were kept as fixed effects. The  
258 variances and covariances of the predicted species values were calculated and a parametric bootstrap  
259 of the mixed model was used to obtain standard deviations on the relative importances. Magnitudes  
260 of the three predicted species contributions to final size were compared with paired samples Wilcoxon  
261 tests (Wilcoxon 1945).

262

263 **Comparison with other toothcarps.** We compare our results with growth data from other studies on  
264 annual and non-annual killifish. We found group averages of size at age, from which we calculated  
265 relative growth per day as above. We point out that such estimates based on averages can be biased  
266 (Hoffmann and Poorter 2002). We did not observe large changes in variances between pairs of data  
267 points from which we calculated growth, therefore we expect such bias to be limited. We retrieved  
268 data from studies on *Austrolebias*, *Nothobranchius* and non-annual rivulids and present relative  
269 growth estimates we found or calculated. We have added relative growth on one Profundulid for  
270 comparison, *Fundulus heteroclitus*, which is a non-annual killifish and a model organism (Schartl  
271 2014). The data file is available as supplementary information. We present a graphical comparison of  
272 the results from our experiment with the values obtained from these studies.

273

274 Results

275

276 We hatched 203 fish that could swim freely, of which 116 reached day 50 after hatching. The  
277 principal component analysis on the coordinates of pond locations resulted in a first PC parallel with  
278 the Atlantic coast in a North-South direction and a second PC orthogonal to that, which therefore  
279 captures differences in the distance from the Atlantic Ocean.

280

281 **Survival and stunting.** When we plotted a log survivorship curve of all survival data, we noted that  
282 the overall death rate is constant. We found no significant effects of age of the embryos on survival  
283 probability until day 50. Species from the (*A. robustus*, *A. vazferreirai*) clade of large species have a  
284 reduced survival probability ( $\beta = -2.06$  (0.70),  $\chi^2(1) = 10.50$ ,  $p = 0.0012$ ). At the same time, there is an  
285 effect of the areas of endemism ( $\chi^2(2) = 9.81$ ,  $p = 0.007$ ). Species from the La Plata area of endemism  
286 have a larger survival probability (estimate difference  $\beta = 1.37$  (0.50), Patos  $\beta = 0.45$  (0.45)). We  
287 found a significant effect of area of endemism on the probability to become stunted ( $\chi^2(2) = 16.26$ ,  $p$   
288  $= 0.0002$ ). There are no stunted individuals among species from the Negro area and about 20% in  
289 species from the other two areas. Large species from the *A. elongatus*, *A. prognathus*, *A.*  
290 *cheradophilus* group had an increased probability to become stunted ( $\beta = 1.57$  (s.e. 0.43),  $\chi^2(1) =$   
291  $13.74$ ,  $p = 0.0002$ ). Smooth functions of spatial coordinate scores had no significant effects on  
292 survival nor stunting.

293

294 **Initial size.** In GAMM models with all fixed and a random species effect, PC's of spatial coordinates  
295 were best fitted with linear functions. We therefore fitted phylogenetic mixed models with such  
296 linear functions to find that the phylogenetic random effect could be removed (LRT non-significant,  
297 AIC smaller without phylogenetic covariances, Akaike 1974). From model selection of the fixed  
298 effects, we found that the three taxa with large species systematically have larger hatchling sizes.  
299 Embryos born from older eggs are larger (Table 1), demonstrating scope for cohort effects and  
300 selection on size in the egg bank. Hatchlings of small species from the Patos area of endemism are  
301 larger relative to the Negro area, and those from La Plata smaller. The first PC score, which increases  
302 in a direction parallel to the Atlantic coast and to the North (called "North" from here on) does not  
303 have a significant effect on hatchling size. The second PC increases towards the Atlantic Coast (Called  
304 "Coast" from here on) and has a negative effect, hence hatchling size decreases for population  
305 situated closer to the Atlantic Coast (Table 1).

306 **Relative growth.** Figure 2 shows growth curves for all individuals in the experiment, and fitted  
307 smooth growth curve functions. The figure shows that relative to other studies and to field data,  
308 individuals in our lab environment have similar or larger sizes for their ages. Moreover, in our  
309 experiment fish seem slightly larger than in the field for their age. The growth data we collected is  
310 therefore relevant. Moreover, individuals growing somewhat slower in our experiment are still  
311 achieving sizes comparable to individuals in the field. Figure 3 shows the pattern of relative growth  
312 across species. Most species initially increase in total length by about 5% per day and by the end of  
313 the experiment, they still do so by about 2% per day on average. Fig. 3 shows that there is much  
314 more individual variation around the species-specific averages for the first days after hatching. We  
315 therefore analyzed daily relative growth until day 15 after hatching and after day 15 separately, thus  
316 separating the dataset into two subsets with comparable numbers of intervals per individual.

317 Different factors affect species differences in different stages of growth (Table 1). Regarding growth  
318 during the first fifteen days, a model with phylogenetic random effects did not outperform a model  
319 with independent species effects (AIC -2495 vs. -2497, no difference in log-likelihood of the fitted  
320 models). Table 1 thus presents a model with independent species effects. Species from the clade  
321 containing *Austrolebias elongatus* grow more rapidly than the other species, about 1-2 % faster per  
322 day. Individuals that could not be sexed by the end of the experiment were growing slower shortly  
323 after hatching (Table 1). When splines of the PC's of spatial locations were fitted, these contributed  
324 significantly in the complete model, but did not do so after model selection.

325

326

327 **Table 1.** Contributions of explanatory variables to hatchling size and relative growth variation. Parameter  
 328 estimates and their s.d. for fixed effects of the mixed effect models. Most model parameters are differences  
 329 from the estimated intercept, which predicts the value of an individual female of a small species originating  
 330 from the Negro area of endemism. Chi-squared values and tail probabilities of likelihood ratio tests are added  
 331 when significant for that explanatory variable. "NS" indicates effects that were not significant and removed  
 332 during model selection.

| Explanatory Variables                                               | Response Variables                                                           |                                                                                   |                                                                                     |
|---------------------------------------------------------------------|------------------------------------------------------------------------------|-----------------------------------------------------------------------------------|-------------------------------------------------------------------------------------|
|                                                                     | Initial Size                                                                 | Early relative growth                                                             | Late relative growth                                                                |
| Intercept (Female, Negro area)                                      | 4.85 (0.24)                                                                  | 1.045 (0.003)                                                                     | 1.037 (0.002) <sup>§</sup>                                                          |
| Days since hatching                                                 | NA                                                                           | NS                                                                                | -0.0007 (0.00003) <sup>§</sup><br>$\chi^2(1) = 365.82; p < 0.0001$                  |
| Embryo age                                                          | 0.016 (0.003)<br>$\chi^2(1) = 21.6; p < 0.0001$                              | NS                                                                                | NS                                                                                  |
| Area of endemism                                                    | La Plata -0.37 (0.28)<br>Patos 1.30 (0.33)<br>$\chi^2(2) = 21.2; p < 0.0001$ | NS                                                                                | La Plata 0.0072 (0.0021)<br>Patos 0.0047 (0.0020)<br>$\chi^2(2) = 10.2; p = 0.0062$ |
| Large clade 1<br>( <i>A. wolterstorffi</i> )                        | 3.09 (0.41)<br>$\chi^2(1) = 23.8; p < 0.0001$                                | NS                                                                                | NS                                                                                  |
| Large clade 2<br>( <i>A. robustus, vazferreirai</i> )               | 1.70 (0.33)<br>$\chi^2(1) = 17.1; p < 0.0001$                                | NS                                                                                | 0.0073 (0.0030)<br>$\chi^2(1) = 5.17; p = 0.017$                                    |
| Large clade 3<br>( <i>A. elongatus, cheradophilus, prognathus</i> ) | 3.96 (0.26)<br>$\chi^2(1) = 44.1; p < 0.0001$                                | 0.015 (0.004)<br>$\chi^2(1) = 8.70; p = 0.0032$                                   | -0.0043 (0.0017)<br>$\chi^2(1) = 5.09; p = 0.024$                                   |
| Sex                                                                 | NS                                                                           | Male 0.0014 (0.0028)<br>Unknown -0.0053 (0.0029)<br>$\chi^2(2) = 6.29; p = 0.043$ | NS                                                                                  |
| Stunted                                                             | NS                                                                           | NS                                                                                | -0.0084 (0.0011)<br>$\chi^2(1) = 55.89; p < 0.0001$                                 |
| North                                                               | NS                                                                           | NS                                                                                | NS                                                                                  |
| Coast                                                               | -0.45 (0.12)<br>$\chi^2(1) = 14.1; p = 0.0002$                               | NS                                                                                | NS                                                                                  |

333 <sup>§</sup>Days since hatching are rescaled, such that the intercept estimates relative growth at day 15.

334 Relative growth later in the experiment is still above 3% per day but declines to below one percent  
335 per day at the end of the experiment. Again, a model including phylogenetic next to independent  
336 species effects was not preferred and Table 1 presents results from the model with independent  
337 species effects only. Species from the *Austrolebias elongatus* clade grew slower, whereas *A.*  
338 *robustus* and *A. vazferreirai* grew faster. Stunted individuals grow slower. Species from the La Plata  
339 and Patos assemblages grow faster per day, with the largest effect for the La Plata species. When we  
340 added spatial coordinates in a GAMM, linear functions of them performed best but these were not  
341 retained after model selection. Note that we did not detect any significant sex-specific effects on  
342 growth.

343 **Contributions to final size variation.** When we inspect the three log-transformed components of  
344 final size (Figure 4), hatchling size clearly makes the largest contribution to final size in the  
345 experiment. The contribution of initial size to log final size is significantly larger than that of early  
346 growth. The early growth contributions are larger than late growth (both paired Wilcoxon tests  $p <$   
347  $0.0001$ , Figure 4). Across individuals, initial size contributes 0.65 (s.d. 0.10) in relative importance of  
348 the final size variance, early growth 0.35 (0.11) and growth after day 28 contributes 0.003 (0.060).  
349 Initial size thus has a significantly larger relative importance than growth in the second month after  
350 hatching. The last component has a small relative importance because the large negative covariance  
351 between initial size and growth after two weeks cancels the variance of late growth. When we  
352 compare species averages in the figure, it appears that initial size explains most of final size variation  
353 among species, paired Wilcoxon tests comparing magnitudes are significant ( $p = 0.0005$ ). There is  
354 again a negative covariance between initial sizes of different species and late growth which is larger  
355 than the variance between species in late growth. The relative contribution of initial size to final size  
356 variance among species is 0.69 (0.07), of early cumulative growth it is 0.19 (0.09) and growth  
357 towards the end of the experiment contributes 0.12 (0.08). The confidence intervals for relative  
358 contributions among species do not overlap between initial size and early or late growth.



359 **Comparison with *Nothobranchius* and non-annuals.** When we plot relative growth for all individuals  
360 in this dataset (Figure 5) and values from the literature from other related species we see that other  
361 estimates for *Austrolebias* are similar to the values we collected. However, in this experiment,  
362 individuals sustained levels of relative growth (2-3 %) for much longer. The data on non-annual  
363 killifish suggests that these have smaller relative growth rates throughout. *Nothobranchius* fry  
364 initially indeed grow explosively, but drop to relative growth rates below the ones in this experiment  
365 after three weeks. We note that relative growth in the first weeks for *Nothobranchius* is within the  
366 range of measurements we made. We can assume that extremely large relative growth rates in our  
367 data are due to measurement error. Alternatively, the data could suggest that some individuals in  
368 this experiment are not growing much slower than the average *Nothobranchius*.

369

370 Discussion

371

372 Hatchling size is the largest contributor to size variation between *Austrolebias* species and its relative  
373 importance is significantly larger than that of early or late growth. It is not only determined by  
374 species differences, but also by parental or environmental effects, since we found effects of storage  
375 duration on hatchling size, of area of endemism and of the distance of the site of origin from the  
376 Atlantic coast. Large species from two clades show different patterns of growth over the experiment  
377 than smaller species. The *A. elongatus* clade grows faster than the other species in the first two  
378 weeks after hatching, but then has a reduced relative growth rate comparable to the smaller  
379 congeners, which we suggest is potentially due to constraints from experimental conditions. The  
380 *robustus* group grows faster than the other species from two weeks after hatching until the end of  
381 the experiment. This indicates that different clades of large species may be reaching their mature  
382 sizes using different growth strategies.

383

384 Adaptive initial size and growth patterns

385 Individual relative growth rates which are decreasing with age after hatching are adaptive when

386 mortality increases with individual relative growth rate, when mortality decreases with size (Sibly et

387 al 1985). Without environmental changes, catch-up growth is not adaptive (Sibly et al 1985). We

388 observed that the rate of death in our experiment is approximately constant, so at least in the

389 context of our experiment the first explanation does not hold overall. We find, within the

390 experiment, a reduced survival probability for the species of the *A. robustus* clade, and an elevated

391 probability of becoming stunted for the *A. elongatus* group of species. There is therefore no

392 evidence of decreased mortality rates with size, rather the opposite is suggested, but in field

393 conditions the pattern might occur nevertheless. Given that the fish in our experiment grew faster

394 than the available field data, a constraint might be present in the field and affect the adaptive

395 pattern of growth but we do observe some catch-up growth in the *A. robustus* clade of large species,

396 contradicting Sibly et al (1985). The adaptive explanations proposed by Sibly et al (1985) are

397 therefore not supported by the experiment and would depend on field conditions such as

398 competition.

399 We can also reject the main expectations of Sibly et al (2015): we did not find that all size variation

400 between species is due to changes in juvenile growth. Secondly, within species, there is substantial

401 remaining relative growth variation even when excluding stunted individuals. More specific for the

402 ecology of annual killifish, our results are in agreement with Eckerström-Liedholm et al (2017). We

403 found a large effect of hatchling size variation on final size and all large species have increased

404 hatchling sizes. However, we also found differences in growth among species which contribute to

405 size variation, most notably the increased early growth rate for the largest species. Our finding that

406 hatchling sizes are smaller closer to the Atlantic coast might indicate that individuals are less

407 constrained there by seasonal variation to achieve an adaptive adult size. I.e., near the coast, the

408 seasonality of rainfall might permit longer growth seasons. However, species from the Patos area of  
409 endemism which is overall close to the coast initially have larger hatchling size, contradicting this at  
410 the between-species level. In addition, we observe that species from the La Plata area of endemism  
411 grow faster later after hatching as well as those from the Patos area, to a lesser extent. This might  
412 again indicate that there is scope for growth during a longer period after hatching near the Atlantic  
413 coast.

414 We also briefly discuss three additional hypotheses on growth variation. First, predation can select  
415 for faster growth. However, we do not know which populations lack predation, except for the Negro  
416 area where no piscivorous *Austrolebias* occurs. Second, Arendt (1997) stated that growth can be  
417 limited because the rate at which morphological structures develop is limited. For example, muscle  
418 structure differs in dependence on growth speed, and can become less efficient with faster growth.  
419 The increased growth rate in the piscivorous species after hatching motivates a further investigation  
420 to check if these species would sacrifice performance efficiency for size. Third, Dmitriew (2011)  
421 explained such costs of growth acceleration in purely ecological terms. When energy allocation is  
422 directed elsewhere for example to reduce the time to complete a stage in development, growth  
423 must be reduced. It is unclear whether hatchlings of piscivorous species would need to achieve a  
424 certain size as soon as possible to permit access to specific resources such as fish prey.

425

426 Comparative lab experiments versus data from the field

427 Comparative studies such as Eckerström-Liedholm et al (2017) use lab or field data, or both. Size  
428 measures from field populations are widely available, but growth rates are often only available as  
429 population averages, or rates calculated from size measurements on different groups of individuals  
430 (e.g. Winemiller and Rose 1992). An advantage of field data is that it can be assumed that each  
431 species has been sampled in an environment it is adapted to. On the other hand, intra- and

432 interspecific competition can affect different species to a different extent, modifying pairwise size  
433 comparisons. We have collected lab data for a comparative analysis. With lab data obtained in one  
434 or several controlled environments, it is likely that some species will be performing less than others  
435 in the chosen environments. Hence, some species will show their overall maximum growth rates  
436 while others may not. To understand the causation of size variation, field data don't seem a valid  
437 substitute for controlled lab experiments, but they can be used to assess the pertinence of growth  
438 patterns observed in the lab. If the purpose is to compare adaptive growth curves between species,  
439 environments tuned to each species or field environments seem required.

440 Martins and Hansen (1996) pointed out that comparative methods often have the same weaknesses  
441 as meta-analyses, and at the time, methods didn't permit incorporating individual variability easily.  
442 In addition, Goolsby (2015) noted that field data might render inference unreliable when it assumes  
443 the absence of phenotypic plasticity. With the advent of phylogenetic mixed models and the  
444 realization that these models are similar to the animal model of quantitative genetics (Lynch 1991),  
445 it has become easier to analyse lab data obtained in complex experimental designs and  
446 environments. We propose to see our data as character states sampled on the species and  
447 individual-specific reaction norms at a particular combination of environmental parameters.

448 Future studies could expand on the environmental treatments imposed and will permit to estimate  
449 species variation for growth plasticity. We did not need the function-valued methods proposed by  
450 Goolsby (2015) to reconstruct ancestral states and maybe infer selection regime shifts, as we had  
451 already obtained hypotheses for shifts in traits for some taxa from other studies and could therefore  
452 use these as starting points in this study.

453 A comparative analysis should not require very many species just to overcome limitations of  
454 individual data points or limitations of the methods of analysis (Mitov et al 2018). The larger the  
455 number of species in an analysis, the less likely that traits are directly comparable between all of  
456 them. It therefore seems most obvious to extend the analysis we carried out to an experiment with  
457 a similar set of species crossed over several lab environments, to obtain first estimates of species

458 variation in plasticity. However, in quantitative genetics, large and long-term datasets and improved  
459 methods have permitted the study of natural selection and phenotypic plasticity in the wild  
460 (Charmantier et al 2014). For comparative phylogenetic methods, mixed models applied to multi-  
461 species field data might permit similar advances, but to limit the range of species for which detailed  
462 data need to be available, and to limit the range of models to be fitted and compared these might  
463 require a priori hypotheses to be tested instead of the automated model selection (e.g. Bastide et al.  
464 2018) which is currently common and demands a large set of species to be included.

465

466 Non-annual and African annual killifish

467 When we compare relative growth rates at different days after hatching between this experiment  
468 and other lab and field studies then it can be noted that early relative growth of *Austrolebias* is  
469 faster than of non-annuals but slower than of *N. furzeri* in some experiments. Later on, after about a  
470 month, the fish in this experiment outperformed nearly all other values we collected. This might be a  
471 side effect of our experimental setup, where we avoided competition and degrading environments,  
472 or it might be the case that *Austrolebias* sustain fast growth longer and thus achieve larger adult  
473 sizes for the same initial size. The amounts of variability we observed between individuals suggest  
474 that it might be possible to tweak environments to obtain relative growth rates closer to the ones  
475 observed in *Nothobranchius* (Blažek et al 2013). Faster growth might require experimental  
476 conditions with fluctuating temperatures (Boltana et al 2017) and there might be species differences  
477 in the extent of this effect. Note that we did not tune the environment to specific species and  
478 neither did we generate a sequence of environmental conditions to obtain the largest possible  
479 growth rates at any age. We chose a standardized common environment where we expected all  
480 species from the three areas of endemism to perform relatively well. The fact that we observed no  
481 stunting among the species from the Negro area and a smaller survival probability for that area  
482 seems to indicate that the environment we chose is not an environment these species are very well

483 adapted to because it led to the strongest expected survival effects on the fish. Species from the *A.*  
484 *robustus* group have a reduced survival probability and a pattern of growth suggesting catch-up  
485 growth. This might also be a side effect of the conditions we imposed, where a non-constant  
486 environment might lead to overall faster growth and larger size.

487

#### 488 Conclusion

489 Using growth curves of 18 *Austrolebias* species, we demonstrate that hatchling size variation is a  
490 main determinant of adult size variation in annual killifish. In addition, we find an increased early  
491 growth rate in the piscivorous species, augmenting their size. Environmental effects of spatial  
492 location of the population of origin on hatchling size and growth suggest that the time constraint  
493 which explains the importance of hatchling size variation for adult annual fish size might be  
494 weakened in populations occurring near the Atlantic coast. This suggests that the manner in which  
495 annual killifish defy the overall expectations on determinants of adult fish size, might be locally  
496 adapted to environmental constraints.

497

498 **Acknowledgements** We thank Tom Smith, Samuel Perret, Beatriz Decenci re and Alexis Millot for  
499 help with fish care. Armand Leroi and Vincent Savolainen for comments on a previous version of this  
500 manuscript.

501 **Funding sources** We thank the UK Nature and Environment Research Council for funding AJH through  
502 grant NE/J500094/1.

503 **Animal Care and Welfare** Fish used in this breeding experiment were maintained and raised at the  
504 CEREEP station in Nemours-St. Pierre, France (approval no. B77-431-1).

505 References

506

507 Akaike H. 1974. A new look at the statistical model identification", IEEE Transactions on Automatic  
508 Control 19: 716–723.

509 Arendt JD. 1997. Adaptive intrinsic growth rates: an integration across taxa. The quarterly review of  
510 biology 72: 149-177.

511 Bastide P, Ané C, Robin S, Mariadassou M. 2018. Inference of Adaptive Shifts for Multivariate  
512 Correlated Traits. Systematic Biology 67: 662-680.

513 Bates D, Mächler M, Bolker B, Walker S. 2014. Fitting linear mixed-effects models using lme4. arXiv  
514 preprint arXiv:1406.5823.

515 Blažek R, Polačik M, Reichard, M. 2013. Rapid growth, early maturation and short generation time in  
516 African annual fishes. EvoDevo 4: 24.

517 Bolker BM, Brooks ME, Clark CJ, Geange SW, Poulsen JR, Stevens MH, White JS. 2009. Generalized  
518 linear mixed models: a practical guide for ecology and evolution. Trends in ecology & evolution 24:  
519 127-35.

520 Boltaña S, Sanhueza N, Aguilar A, Gallardo-Escarate C, Arriagada G, Valdes JA, Soto D, Quiñones RA.  
521 2017. Influences of thermal environment on fish growth. Ecology and evolution 7: 6814-6825.

522 Charmantier A, Garant D, Kruuk LE. 2014. Quantitative genetics in the wild. Oxford University Press,  
523 Oxford.

524 Claessen D, de Roos AM, Persson L. 2000. Dwarfs and giants: cannibalism and competition in size-  
525 structured populations. The American Naturalist 155: 219-237.

- 526 **Costa WJEM.** 2006. The South American annual killifish genus *Austrolebias* (Teleostei:  
527 Cyprinodontiformes: Rivulidae): phylogenetic relationships, descriptive morphology and taxonomic  
528 revision. *Zootaxa* 1213: 1-162.
- 529 **Costa WJEM.** 2009. Trophic radiation in the South American annual killifish genus *Austrolebias*  
530 (Cyprinodontiformes: Rivulidae). *Ichthyological Explorations of Freshwaters* 20: 179–191.
- 531 **Costa WJEM.** 2010. Historical biogeography of cynolebiasine annual killifishes inferred from  
532 dispersal–vicariance analysis. *Journal of Biogeography* 37: 1995-2004.
- 533 **Costa WJEM.** 2011. Parallel evolution in ichthyophagous annual killifishes of South America and  
534 Africa. *Cybium* 35: 39-46.
- 535 **Costa WJEM.** 2018. Comparative morphology, phylogeny and classification of African seasonal  
536 killifishes of the tribe Nothobranchiini (Cyprinodontiformes: Aplocheilidae), *Zoological Journal of the*  
537 *Linnean Society* 184: 115-135.
- 538 **de Villemereuil P, Nakagawa S.** 2014. General quantitative genetic methods for comparative biology.  
539 Pp. 287-303 in *Modern phylogenetic comparative methods and their application in evolutionary*  
540 *biology*. Ed. Garamszegi LZ. Springer, Berlin, Heidelberg, 2014.
- 541 **Dmitriew CM.** 2011. The evolution of growth trajectories: what limits growth rate? *Biological*  
542 *Reviews* 86: 97-116.
- 543 **Eckerström-Liedholm S, Sowersby W, Gonzalez-Voyer A, Rogell B.** 2017). Time-limited environments  
544 affect the evolution of egg–body size allometry. *Evolution* 71: 1900-1910.
- 545 **Ernande B, Dieckmann U, Heino M.** 2004. Adaptive changes in harvested populations: plasticity and  
546 evolution of age and size at maturation. *Proceedings of the Royal Society of London Series B:*  
547 *Biological Sciences* 271: 415-423.



- 548 Errea A, Danulat E. 2001. Growth of the annual fish, *Cynolebias viarius* (Cyprinodontiformes), in the  
549 natural habitat compared to laboratory conditions. *Environmental Biology of Fishes* 61: 261-268.
- 550 Fonseca APD, Volcan MV, Sampaio LA, Romano LA, Robaldo RB. 2013. Growth of critically  
551 endangered annual fish *Austrolebias wolterstorffi* (Cyprinodontiformes: Rivulidae) at different  
552 temperatures. *Neotropical Ichthyology* 11: 837-844.
- 553 Furness AI, Reznick DN, Springer MS., Meredith RW. 2015. Convergent evolution of alternative  
554 developmental trajectories associated with diapause in African and South American killifish.  
555 *Proceedings of the Royal Society of London B Biological Sciences* 282: 20142189.
- 556 García D, Loureiro M, Machín E, Reichard M. 2018. Phenology of three coexisting annual fish species:  
557 seasonal patterns in hatching dates. *Hydrobiologia* 809: 323-337.
- 558 Goolsby EW. 2015. Phylogenetic comparative methods for evaluating the evolutionary history of  
559 function-valued traits. *Systematic biology* 64: 568-578.
- 560 Helmstetter AJ, Papadopulos AS, Igea J, Van Dooren TJM, Leroi AM, Savolainen V. 2016. Viviparity  
561 stimulates diversification in an order of fish. *Nature communications* 7: 11271.
- 562 Helmstetter AJ, Van Dooren TJM, Papadopulos AS, Igea J, Leroi AM, Savolainen V. 2018). Trait  
563 evolution and historical biogeography shape assemblages of annual killifish. *bioRxiv*, 436808.
- 564 Hoffmann WA, Poorter H. 2002. Avoiding bias in calculations of relative growth rate. *Annals of*  
565 *botany* 90: 37-42.
- 566 Hutchings JA. 2002. Life histories of fish. Pp 149-174 in *Handbook of Fish Biology and Fisheries: Fish*  
567 *Biology 1*. Eds. Hart PJB & Reynolds JD. Blackwell Science Ltd.
- 568 Hutchings JA, Jones ME. 1998. Life history variation and growth rate thresholds for maturity in  
569 Atlantic salmon, *Salmo salar*. *Canadian Journal of Fisheries and Aquatic Sciences*, 55: 22-47.

- 570 Jonsson B, Jonsson N, Finstad AG. 2013. Effects of temperature and food quality on age and size at  
571 maturity in ectotherms: an experimental test with Atlantic salmon. *Journal of Animal Ecology* 82:  
572 201-210.
- 573 Law R. 2007. Fisheries-induced evolution: present status and future directions. *Marine Ecology*  
574 *Progress Series* 335: 271–277.
- 575 Lynch M. 1991. Methods for the analysis of comparative data in evolutionary biology. *Evolution* 45:  
576 1065-1080.
- 577 Martins EP, Hansen TF. 1996. The statistical analysis of interspecific data: a review and evaluation of  
578 phylogenetic comparative methods. In *Phylogenies and the Comparative Method in Animal*  
579 *Behavior*. Ed. Martins EP. Oxford University Press.
- 580 McCullagh P, Nelder JA. 1989. *Generalized Linear Models*. Chapman and Hall, London.
- 581 Mitov V, Bartoszek K, Stadler T. 2019. Automatic generation of evolutionary hypotheses using mixed  
582 Gaussian phylogenetic models. *Proceedings of the National Academy of Sciences* 116: 16921-16926.
- 583 Pauly D. 1979. Gill size and temperature as governing factors in fish growth: a generalization of von  
584 Bertalanffy's growth formula. *Berichte aus dem Institut für Meereskunde an der Christian-Albrechts-*  
585 *Universität · Kiel* 63.
- 586 Persson L, Wahlström E, Byström P. 2000. Cannibalism and competition in Eurasian perch:  
587 population dynamics of an ontogenetic omnivore. *Ecology* 81: 1058-1071.
- 588 Pinheiro JC, Bates DM. 2000. *Mixed-effects models in S and S-PLUS*. Springer, New York.
- 589 Rees M, Osborne CP, Woodward FI, Hulme SP, Turnbull LA, Taylor SH. 2010. Partitioning the  
590 components of relative growth rate: how important is plant size variation? *The American Naturalist*  
591 176: E152-E161.

- 592 **Roff DA.** 1993. Evolution of Life Histories: Theory and Analysis. Springer US.
- 593 **Schartl M.** 2014. Beyond the zebrafish: diverse fish species for modeling human disease. Disease  
594 models & mechanisms 7: 181-192.
- 595 **Schluter D.** 1996. Adaptive radiation along genetic lines of least resistance. Evolution 50: 1766-1774.
- 596 **Sibly R, Calow P, Nichols N.** 1985. Are patterns of growth adaptive? Journal of theoretical biology  
597 112: 553-574.
- 598 **Sibly RM, Baker J, Grady JM, Luna, SM, Kodric-Brown A, Venditti C & Brown JH.** 2015. Fundamental  
599 insights into ontogenetic growth from theory and fish. Proceedings of the National Academy of  
600 Sciences, 112: 13934-13939.
- 601 **Therneau T.** 2012. The lme4 function. Rochester, MN: Mayo Clinic.
- 602 **Van Dooren TJM, Thomassen HA, Smit F, Helmstetter AJ, Savolainen V.** 2018. Scope for sympatric  
603 giant-dwarf speciation driven by cannibalism in South-American annual killifish (Austrolebias).  
604 bioRxiv, 121806.
- 605 **Vrtílek M, Žák J, Pšenička M, Reichard M.** 2018. Extremely rapid maturation of a wild African annual  
606 fish. Current Biology 28: R822-R824.
- 607 **Wilcoxon F.** 1945. Individual comparisons by ranking methods. Biometrics Bulletin 1: 80–83.
- 608 **Winemiller KO, Rose KA.** 1992. Patterns of life-history diversification in North American fishes—  
609 implications for population regulation. Canadian Journal of Fisheries and Aquatic Sciences 49:2196–  
610 2218.
- 611 **Wood SN.** 2017. Generalized Additive Models: An Introduction with R (2<sup>nd</sup> ed). Chapman & Hall/CRC  
612 Press.

613 **Wourms JP.** 1972. The developmental biology of annual fishes. III. Pre-embryonic and embryonic  
614 diapause of variable duration in the eggs of annual fishes. *Journal of Experimental Zoology Part A:*  
615 *Ecological Genetics and Physiology* 182: 389-414.

616

617 Supplement

618 If measurement error is the same for length measurements at different ages and equal to  $\sigma_y^2$ , we  
619 can calculate an approximation to the measurement error in the relative growth rate (Eqn. S1) using  
620 a first-order Taylor expansion of total length  $y$ ,

$$621 \quad \sigma_{g_i}^2 = \sigma_y^2 \left( \frac{1}{t_{i+1} - t_i} \right)^2 \left( \frac{y_{i+1}}{y_i} \right)^{\frac{2}{t_{i+1} - t_i}} \left( \left( \frac{1}{y_{i+1}} \right)^2 + \left( \frac{1}{y_i} \right)^2 \right) \quad (\text{Eqn. S1})$$

622

623 We included this error model in linear mixed models for relative growth rate variation. However,  
624 there is no software available to combine such error models with phylogenetic mixed models. We  
625 therefore fitted independent species effects (Pinheiro and Bates 2000). As an alternative to this  
626 error model, we also allowed the residual variance to depend on the age of the individual. The  
627 likelihoods of the data assuming either of these models were compared, also with the likelihood  
628 obtained from the model assuming a homoscedastic residual variance. We found that the model  
629 where the residual variance depended on individual age outperformed the other two models for  
630 early relative growth. We report here the fixed effect tests of that model. For late relative growth,  
631 homoscedastic errors were preferred, which is the model in the last column of Table 1.

632

633

634

635

636 Figure legends

637

638 Figure 1. Overview of size data on *Austrolebias* annual killifish from different studies. Per species,  
639 silhouettes show the average contour shapes of the species in this experiment at hatching (black), at  
640 day 28 (light grey) and at the end of the experiment (dark gray). Bars to the right of the contours  
641 indicate standard length data from up to four datasets. Uppermost bar: the size PC used by Van  
642 Dooren et al (2018), second bar: maximum sizes used in Helmstetter et al (2018). Third bar: lengths  
643 from a lab experiment in Leiden in the Netherlands in 2008. Fourth bar: data collected in 2013 from  
644 outdoor breeding stocks at the Foljuif field station foljuif.ens.fr and outdoor breeding in a private  
645 garden in the Netherlands. An inset (B) shows the three areas of endemism species in this study  
646 originate from. Locations where fish populations originate from are added as points. Inset photos:  
647 (C) *A. elongatus* (Photo credit Marcos Waldbillig), which is the largest known *A. elongatus* male; (D)  
648 *A. reicherti* ("Paso del Dragon").

649 Figure 2. Overview of growth curves of the different *Austrolebias* species in our dataset. Age is  
650 expressed as number of days after hatching. Per species, the growth curve predicted by a smoothing  
651 spline with a smoothness parameter shared by all species is added. Only the data on non-stunted  
652 individuals were used to fit smoothing splines. For comparison, data points from other studies on  
653 some of the species we measured are added and colour-coded as follows. Red: individual size-at-age  
654 data in the natural environment. *Austrolebias bellottii*, *A. nigripinnis* and *A. elongatus*: individual  
655 total lengths at age from the Garcia et al. 2017 field study. Blue: Average size at age. *Austrolebias*  
656 *viarius*: total length lab data were taken from Errea and Danulat (2001), *A. wolterstorffi* standard  
657 length lab data from Fonseca et al (2013).

658

659 Figure 3. Relative growth per day for the different *Austrolebias* species in this study. Grey lines  
660 indicate individual growth histories. Black lines show fitted smooth functions with confidence bands  
661 added as in figure two. Data on stunted individuals are not shown.

662

663 Figure 4. Contributions of log initial size, early and later growth to total size in *Austrolebias*.  
664 Individual data points (small squares) are shown for log initial size (red), log cumulative growth from  
665 day 1 to 29 (blue) and log cumulative growth from day 29 to 58 (black). Only individuals that were  
666 not stunted and that survived until day 56 are included. Per species, average values are shown as  
667 circles with the same colours per component as for the individual data. The three top circles are the  
668 average components and total size at the end of the experiment for *A. elongatus* (average log of the  
669 total length in mm, 4.16), the three bottom circles *A. nigripinnis* (average log total length 3.28).

670

671 Figure 5. Comparison of relative growth per day in *Austrolebias* with other studies on *Austrolebias*  
672 (black points), *Nothobranchius* annuals (blue) and non-annuals (red). The individual field data added  
673 in Fig. 2 is omitted here. Other studies did not provide individual values, therefore relative growth  
674 was estimated from average sizes at age. *Austrolebias* data of this study are plotted per individual  
675 (grey) and the smooth curves from Figure 3 per species are added (black). Squares: field data, circles:  
676 lab data. The square at age zero is a relative growth rate estimate for *Rivulus hartii* obtained from  
677 field data, but it was unclear at which age the estimate applied.

678

679 Figure 1

680

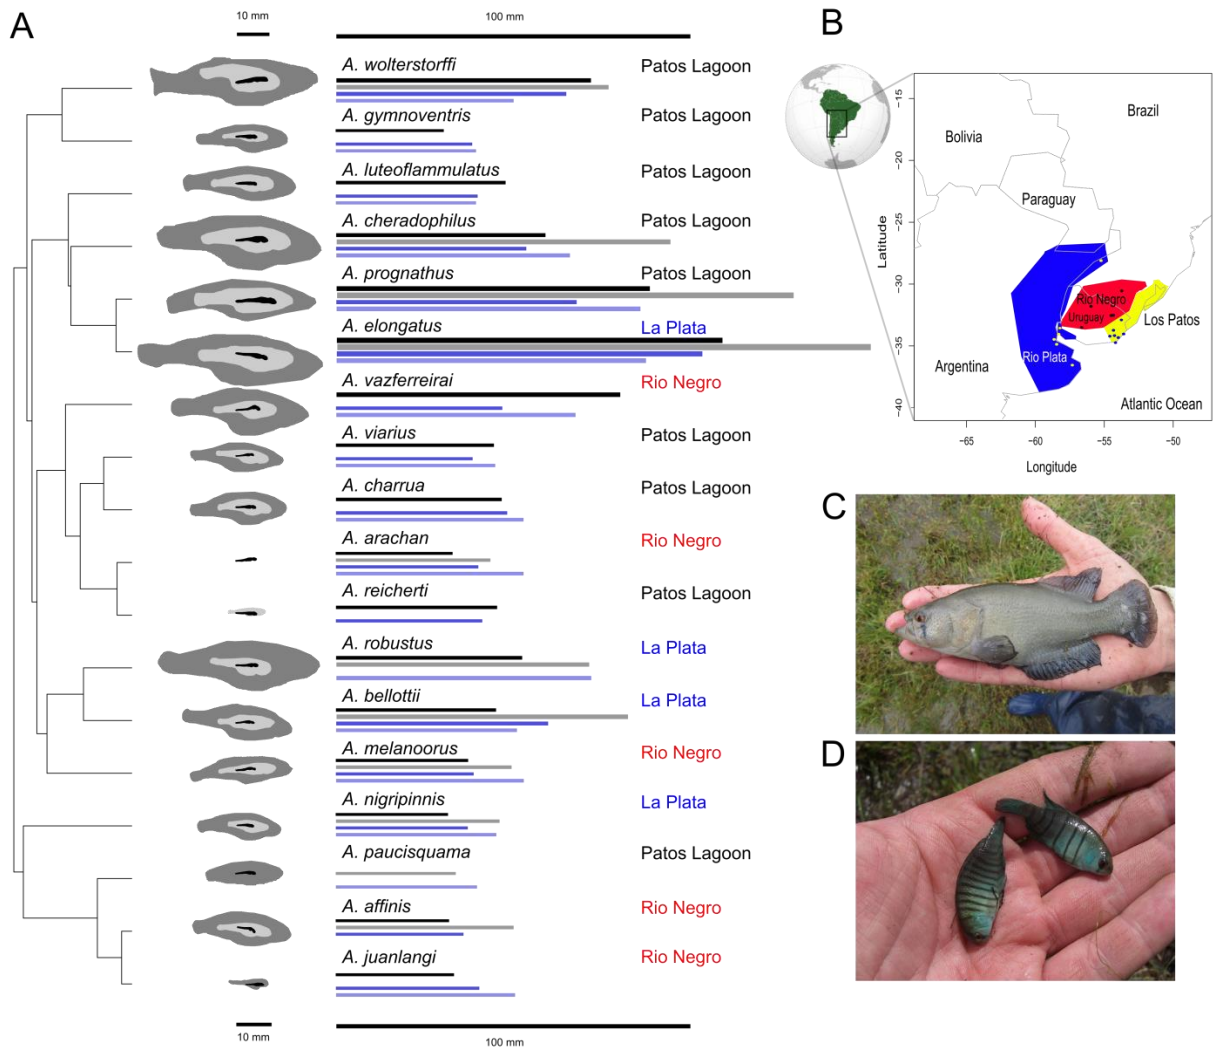

681

682



683 Figure 2

684

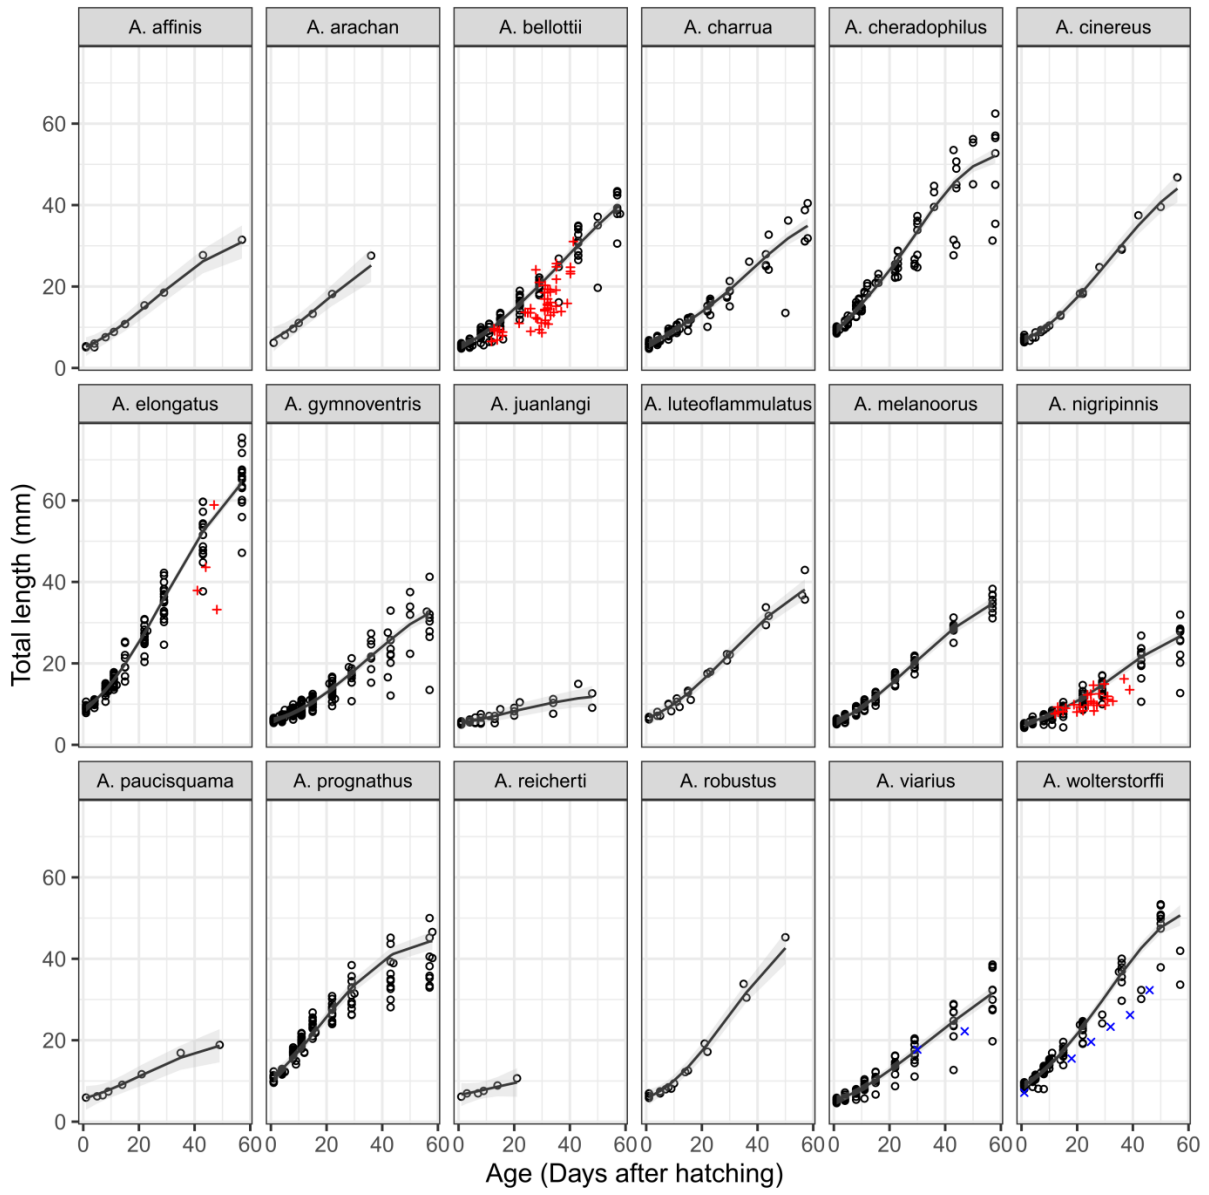

685

686

687 Figure 3

688

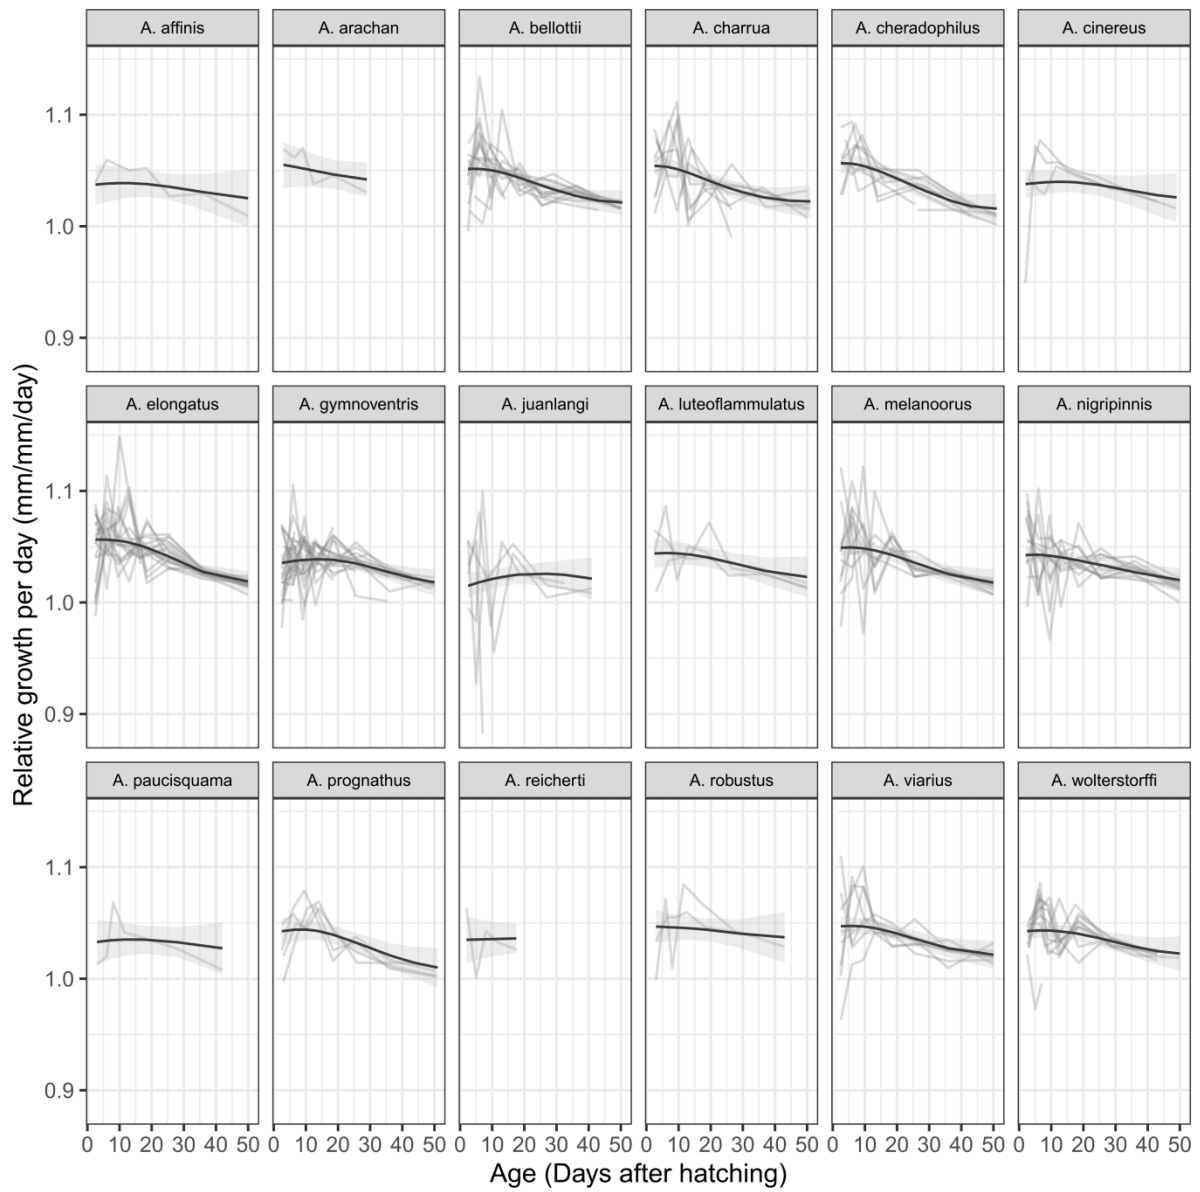

689

690

691 Figure 4

692

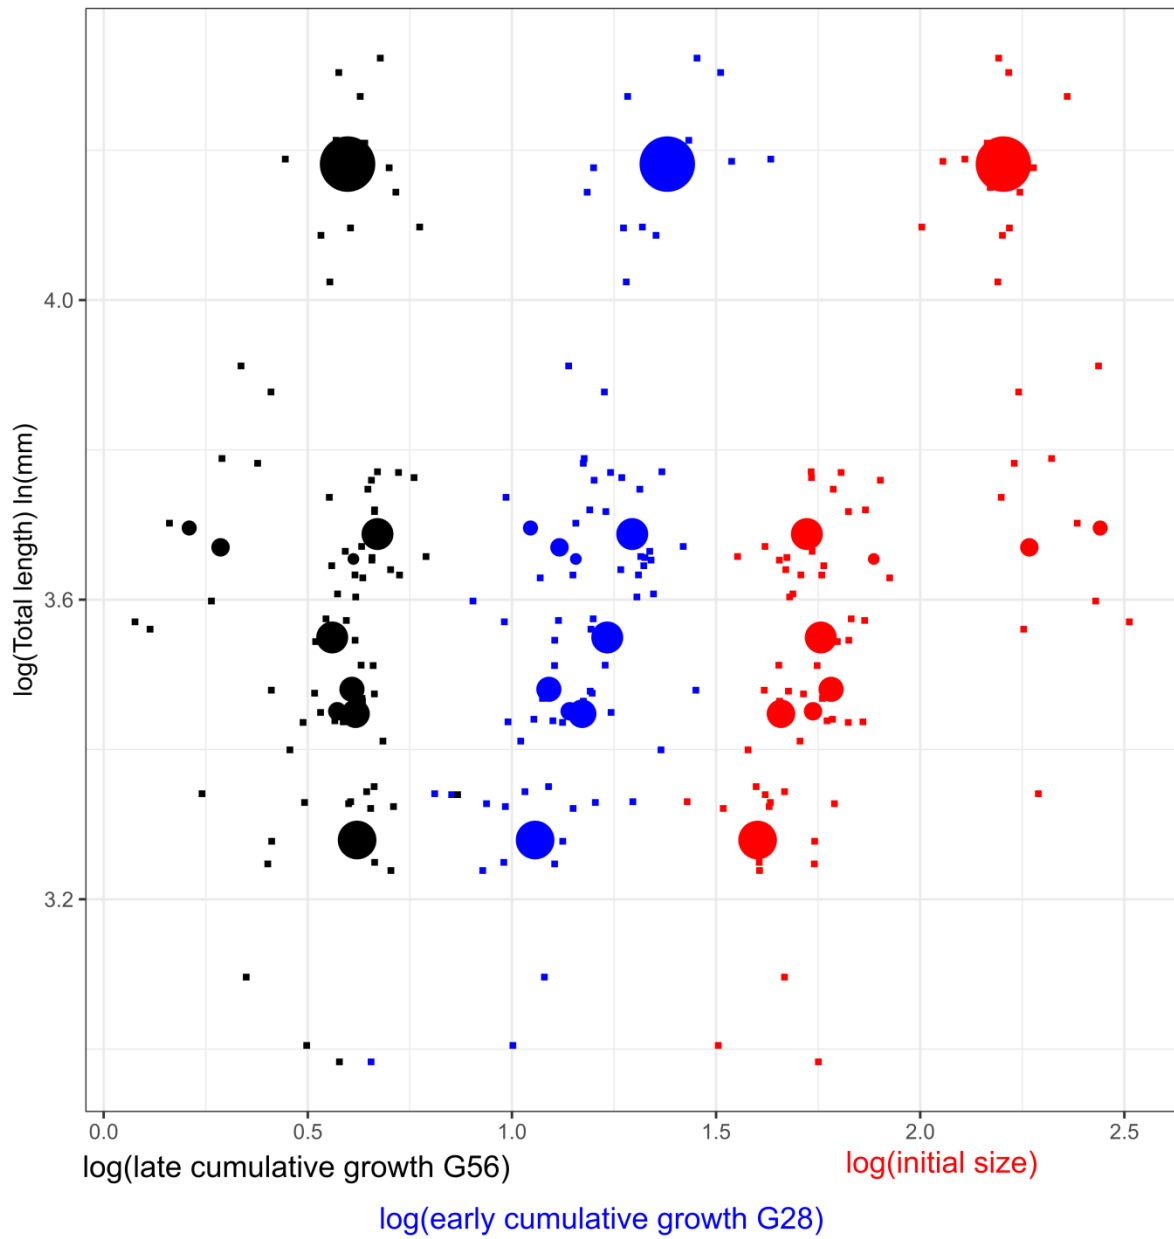

693

694

695 Figure 5

696

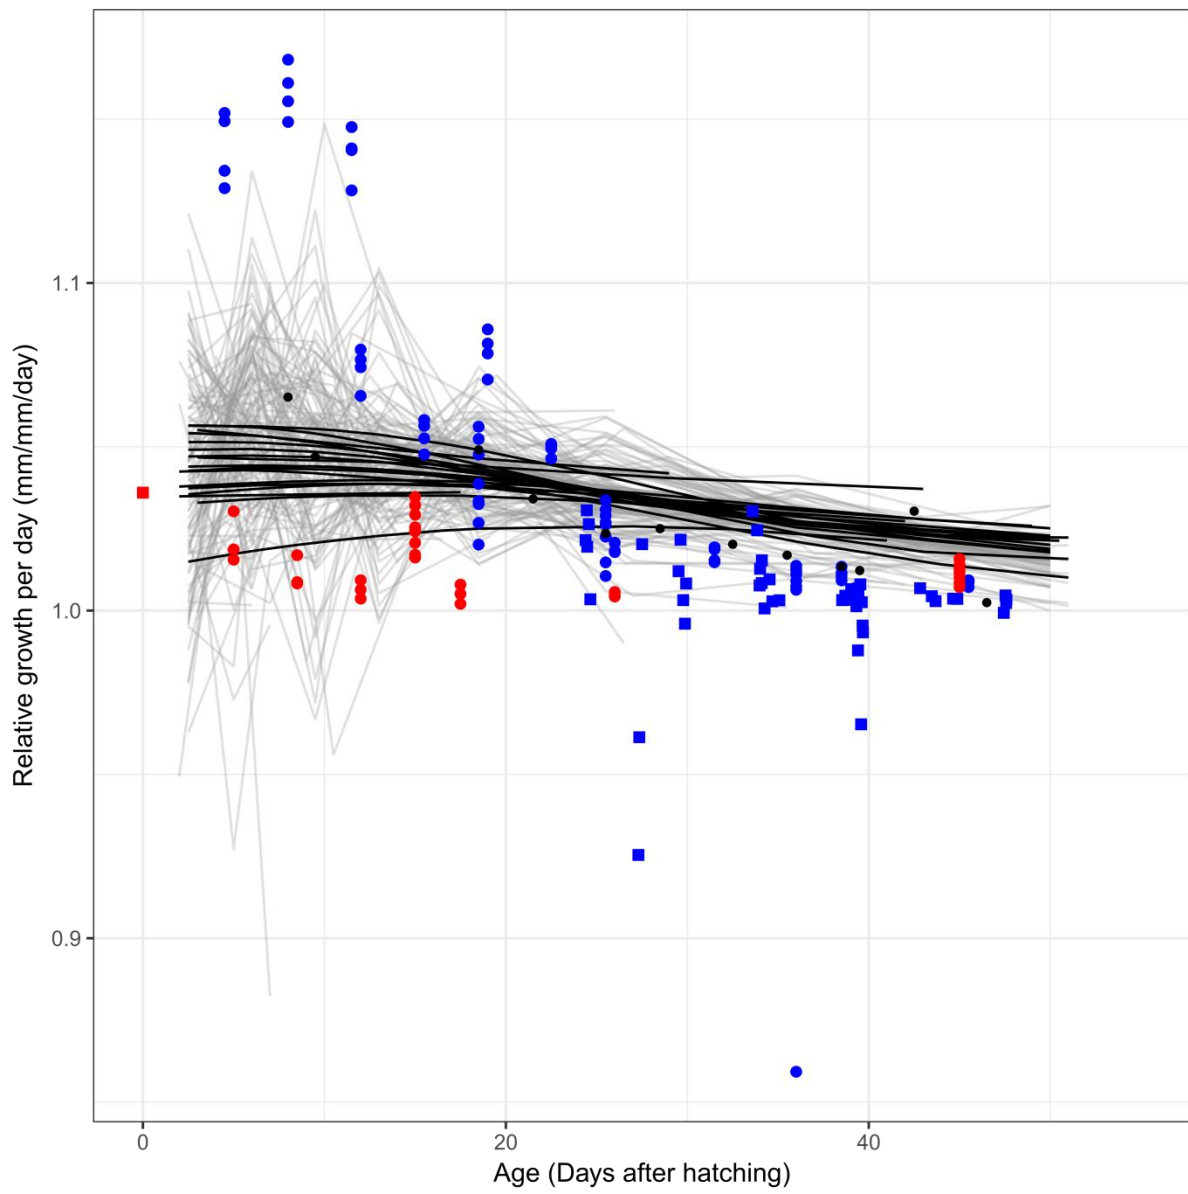

697
